# Supplementary material for: Identification of malaria parasite-infected red blood cell surface aptamers by inertial microfluidic SELEX (I-SELEX)
Source: PubMed Central journal article supplement (PMC4486934; doi:10.1038/srep11347), 2015-07-01
Supplement: srep11347-s2.pdf [file srep11347-s2.pdf]

## **Identification of malaria parasite-infected red blood cell surface aptamers by inertial microfluidic SELEX (I-SELEX)**

Christina M. Birch<sup>1</sup>, Han Wei Hou<sup>2,3</sup>, Jongyoon Han<sup>1,2,3</sup> and Jacquin C. Niles<sup>1</sup>

<sup>1</sup>Department of Biological Engineering, Massachusetts Institute of Technology, 77 Massachusetts Avenue, Cambridge MA 02139, USA

<sup>2</sup>Department of Electrical Engineering and Computer Science, Massachusetts Institute of Technology, 77 Massachusetts Avenue, Cambridge MA 02139, USA

<sup>3</sup>BioSystems and Micromechanics (BioSyM) IRG, Singapore-MIT Alliance for Research and Technology (SMART) Centre, 1 Create Way, #04-13/14 Enterprise Wing, Singapore 138602, SINGAPORE

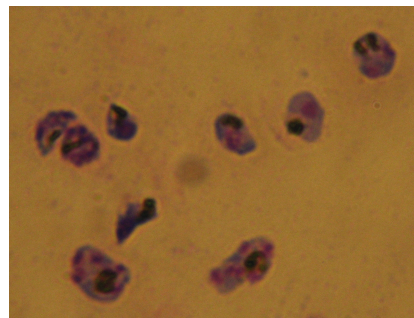

MACS-enriched iRBCs

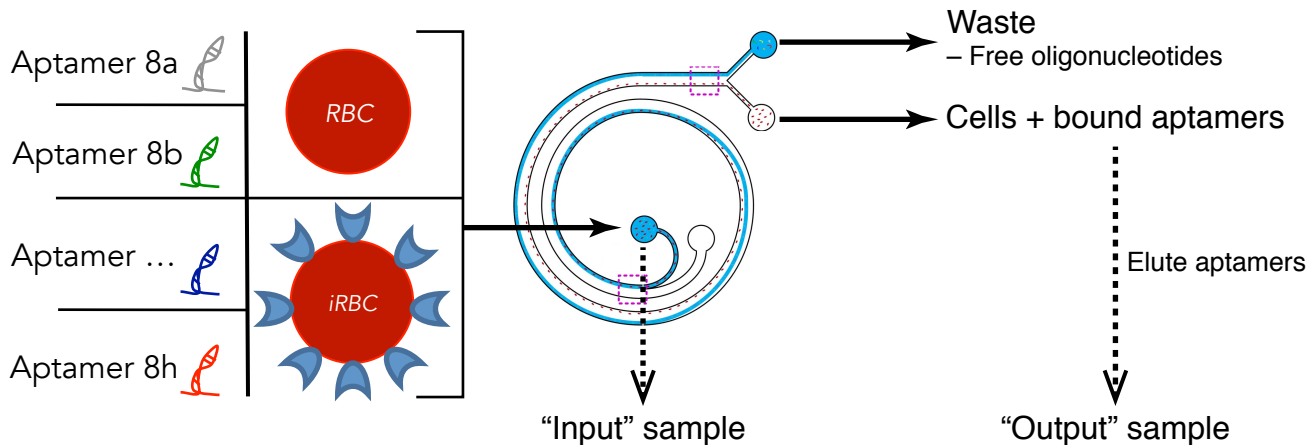

**Supplementary Figure S1.** A schematic of the aptamer enrichment assay. A single aptamer species is incubated with a target cell type (CS2 iRBCs, protease-treated iRBCs, DC-J iRBCs) or a negative control cell type (uninfected, mock-cultured RBCs). A small fraction of the reaction mixture is measured by qPCR to verify the “input” amount of aptamer. After incubation, the reaction mixture is passed once through the inertial microfluidic device, partitioning unbound aptamers from cells. Aptamers bound to the cell surface are eluted and quantified by qPCR as the “output” amount of aptamer. As measured by qPCR, all input samples have identical Crossing Points (Cp) and output samples are dependent on reaction conditions. The difference between input and output Cps ( $\Delta\text{Cp}$ ) is used to calculate aptamer recovery. Aptamer recovery between target and control cell types ( $\Delta\Delta\text{Cp}$ ) is used to establish statistical significance of aptamer enrichment.

Supplementary Table S1. Sequences recovered from de novo I-SELEX on tRBC targets.

| Clone ID            | $K_d$ (nM) | Sequence of variable region                                 |
|---------------------|------------|-------------------------------------------------------------|
| <b>Cluster I</b>    |            |                                                             |
| 3-25                |            | <b>GUUACUG</b> AUCUUCUGCAGCGCGAAUCACAUUGAUGAAGCCGGAUCGACG   |
| 3-30                | A          | <b>GUUACUG</b> CGCUCUUACGAGGUAAUCUUAUGUUGGCAUUCGUAGUACU     |
| 5-1                 | A          | <b>GUUACUG</b> AGCUCUUGUGUGUACAGUUGAGAAUCACAACGAUCCUCUG     |
| 5-2                 | A          | <b>GUUACUG</b> GGUUCCCCUCCCAACCGCAUCGUAUGCCGGCAACCGA        |
| 5-5                 | 2          | A <b>GUUACUG</b> AGUUCGGGGAGGGGUAGAGCUCUACCGCCCAAUAGCGA     |
| 5-8                 |            | <b>GUUACUG</b> GGUUCCGCACAAAUGAGAUUUUUGUUUUUUAUCUGCCUCA     |
| 5-10                |            | <b>GUUACUG</b> AGAGCCUUGACCCUCUGGAGCCACGACGUCGUGAAUUGAGG    |
| 5-11                |            | <b>GUUACUG</b> ACACUCCCGUUGGUGCGAAGCACCAGUAACGACAGACUCAG    |
| 5-12                | 2          | <b>GUUACUG</b> AGCUCAGUCGGGUGACGCGUCACCCUCUAGGAGAGACUCUGU   |
| 5-14                | A          | <b>GUUACUG</b> AUGUCCCGGAACUGGUGGGCAUUGGCAGACAUUGCAGCAGG    |
| 5-15                | A          | <b>GUUACUG</b> CGCUCUUAUCUGGCUCAUUGUGCCCGCAUCGAGGACAUG      |
| 5-17                |            | <b>GUUACUG</b> AACUCUCGCGGUGCGCCACGUUGAUUGCAGUCGACUUCAG     |
| <b>Cluster II</b>   |            |                                                             |
| <b>Toggle-25</b>    | 40         | <b>GAACAAAGCUGAAGUAC UUAACCAAG</b> AUCAUCCCGA               |
| 3-4                 |            | UGAUGUAAGACUGUUAUUGUGUGUUA <b>UUGCCCAAG</b> UUUGGUCUGUAUUG  |
| 3-10                |            | UGGUGACUGGGUGAGAAUAGCAU <b>UUGCCCAAG</b> UCAUUCGAGUCUACAAC  |
| <b>3-19 (2)</b>     | > 1000     | CUGCCUGAGACUGCACUUUUCGCUCC <b>UUCCCCAAG</b> UCUIUUUGGAGUU   |
| 5-6                 |            | CGAAUGCCGAAAUAAGAGCGUG <b>UUCUCCAAG</b> CCCGACUCGUACGGCUCGA |
| <b>Cluster III*</b> |            |                                                             |
| 3-1                 |            | UCAAAUUAGUGCGCGAGGACUAUUAGGACGUCAGUACAUAUAUCAGAA            |
| 3-2                 |            | CGAAAAACAGUAUACGAGCAUCCUUCGUAUCCACCUUGAAAUAUAAAC            |
| 3-5                 |            | UAAGUUGCAGUAUUGGAGUCCUGAAAUGGACGUACGGUCCUUAU                |
| 3-6                 |            | UAGUCAUUGGUAAAAACAGUCUCCAAUCGAAUAUUACCGGUUAUGUUU            |
| <b>3-7 (4)</b>      | > 1000     | CAACGGAUACACAGCAAGCGAAUCUUAUGUCCUUCGGGUCUAAAGGUCGCU         |
| 3-8                 |            | UCCAUUUCUUCGAAACGAUGAGCAC                                   |
| <b>3-9</b>          | 4          | ACGAACGUACAAGUUUAUGAAGAACUGACCCUUAUUGUCAUCCACACUCA          |
| 3-11                |            | ACUUAAGAAUCCGACCGGGGUGACAAUUAUCCUUCUUGUUUUGUUAAC            |
| <b>3-12</b>         | 200        | GAUCAAUUUAUAUAUCCGACUCGAGAUUAUAUAUAUUGUAGUGG                |
| 3-13                |            | ACAGGUUUUAAGUUUUCGUUUCGUAUGGAUUUUAACAAUCUAGAUC              |
| 3-14                |            | AUAAGCUGAUUUUUCAGAACAUUUUAUAUACAGUCACACAGGCUCGAG            |
| 3-15                |            | CCAUUUUAAGGAUACCGCUGCCCUACCCUUGCGGUUCAGCCGACCUUU            |
| 3-16                |            | GGUUUUAAUUUAGUACUUCUUAUAGUUUUAUAGCCUUGAACAUUGGGA            |
| 3-17                |            | CUUUGCCUUAUAUAUAUAGGUAACAUAAGUAGUGUAACGUUUGGUA              |
| 3-18                |            | UACCGUUUAAGAAUGAGUUCAGAGUAAAAGUUUAUGUCCUGCAUGUCUAG          |
| 3-24                |            | UGGGAGCCGAUAUAAGCAAUGUAUCACUUGCGCAUUGAAGUCGGACU             |
| 3-26                |            | CAUUUGCGCGAAUCAGGCUUGCUUGUUAACACUGCAACGGUUUUAUCG            |
| 3-27                |            | CCGCGACUUGCACUGUACCGCGUACCUUGCCUAUUGUUCUGUAAAAGAA           |
| 3-28                |            | AAGGUUGAUGGCGUUGAUUCUUAUGUCAUUAUUCGUUUGCUUUAAGACGU          |
| 3-29                |            | AUGAUUGAUUAUCAUGAAAAUGGCGUGGUGUAACACUACCCUGAUUUG            |
| 5-7                 |            | UUGCACCAAGGUUCGAAAUAUGAGCGGGCAGCGUCGAAUGCCGUAAU             |

Supplementary Table S2. Sequences recovered from de novo I-SELEX on malaria-parasite infected red blood cell targets. Clones are grouped by the stringency of the selection from which they were derived: Selection 1 (increased stringency for Rounds 6-8) and Selection 2 (consistent stringency across all 8 rounds). Tested sequences are shown in bold alongside their enrichment values ( $\Delta\Delta C_p$ ) and the statistical significance (P value) of enrichment over scrambled negative control sequences (scr8.1-1 and scr8.2-1).

| Clone ID                   | Copy # | $\Delta\Delta C_p$ | P value | Sequence of variable region                         |
|----------------------------|--------|--------------------|---------|-----------------------------------------------------|
| <b>Selection 1</b>         |        |                    |         |                                                     |
| <b>8.1-1</b>               | 4      | 3.115              | 0.0002  | CAACGGATCACACGCAAGCGAATCTATGTCCTTCGGGTCTAAGGGTCGCT  |
| <b>8.1-2</b>               | 2      | 3.405              | 0.027   | GTCAGAGTATGGGTACTGCAAGCTGCATGTGTTGCTCCGCTTAGACCCCTA |
| <b>8.1-3</b>               | 1      | 1.476              | > 0.1   | TCCCGCGCCATGGCGCCGGGAGCATGCGAGTCGGGCCAATTCGCC       |
| <b>8.1-4</b>               | 1      | 1.965              | > 0.1   | GTCCGGTAGCGAGAGGACTTGGCAGCTTTGGTGAGCATAAGCTGTAGAC   |
| <b>8.1-5</b>               | 1      | 3.18               | 0.0378  | GTAAGCGGACGATGGTGCGTGGGCGAATTGATCAGTACTTACTGTGCGAA  |
| 8.1-6                      | 1      | -                  | -       | GTGGAATCAACCCCGACTTAAAAACCTAACCGGATTCGGTTTGGCGAA    |
| 8.1-7                      | 1      | -                  | -       | GGCATCGATTGTATTACTCATGTCTCCGAGTACTCCGAATGGCCGGCGT   |
| 8.1-8                      | 1      | -                  | -       | GTGAGTGTGTTGACAATCGGAGCTAAGATGATGGCCGTGGTCAACGGA    |
| 8.1-9                      | 1      | -                  | -       | TGTAGAGATTTCTGGAGCGTCAAAAGTAGGATGCCAAGATCGGTTGGA    |
| 8.1-10                     | 1      | -                  | -       | GAGTGGTATCGGATCGGACGAATAGATTGCCCGTTAGGATCGTACCTGA   |
| 8.1-11                     | 1      | -                  | -       | TTTGGAGCGATATGCGATATATCGATTGTAGATGAAGTCATGCAGTGGAA  |
| 8.1-12                     | 1      | -                  | -       | GACAAAGATCCTAAAACATGCGCGTAACCGGACAGTATTGTAGCTTTGTG  |
| <b>Selection 2</b>         |        |                    |         |                                                     |
| <b>8.2-1</b>               | 3      | 2.631              | 0.0159  | CCAGGGTAAGTTAGTGTAGGACTTGTCTACATAGGATCGAATCGGTGG    |
| <b>8.2-2</b>               | 3      | 3.388              | 0.0243  | CTCGGATACTTAATAATAGAATTGGCCAGACGCATGCATATCCGCCAG    |
| <b>8.2-3</b>               | 1      | 3.125              | 0.0131  | GGCCTATCTGGGAGGAAAGCAGCCCAATTCGAACAGGTATGTGTGATCTG  |
| 8.2-4                      | 1      | -                  | -       | AGGAAACTAATGTTGATACAACCTGGGTACAATTAGTATCCCGGTGATCT  |
| 8.2-5                      | 1      | -                  | -       | CTTTTGTGTGATCGTTTATCCTAATGGTTTATCCGAGCTGGGATA       |
| 8.2-6                      | 1      | -                  | -       | GGAGTATCAATCGGCACAGGTATGAGCAATCAGTTATGCACGTTTCCG    |
| 8.2-7                      | 1      | -                  | -       | GGGATTGGGTGTCAGTCTGTAGAGTAGGTTACAGTATGAGCTTCA       |
| 8.2-8                      | 1      | -                  | -       | AATTGGTCCGAATGACGGAGTTTTCGTCTAGATGCTAGGAAATGTTGCC   |
| 8.2-9                      | 1      | -                  | -       | GTATAGGGTACTGTTCTGCTGCATTGGCCAGGTCATATAAGTCAGTTCT   |
| 8.2-10                     | 1      | -                  | -       | TGGTGGTCGTCTCAAAAACCGCTATTGCGATGGATAGGCGTATTGCTC    |
| 8.2-11                     | 1      | -                  | -       | GCAATGATTTGCATATCCTCTGAGCTGTGATCACCGCTAACATAACAGTC  |
| 8.2-12                     | 1      | -                  | -       | TGACTTAAATGCCGAAGCGTTGACGTGATGGAGGATTTGCCGAACATTC   |
| 8.2-13                     | 1      | -                  | -       | TGAAAGCACTACATTTATTGGTGATGAAAGTGCCTGATGCTGTTCCGC    |
| <b>Scrambled Sequences</b> |        |                    |         |                                                     |
| <b>scr-8.1-1</b>           | n/a    | 1.243              | null    | ATGTCTCCAGCTCTTGTGGCGAACCAAGCGGGTTGACCAGAATGCATCA   |
| <b>scr-8.2-1</b>           | n/a    | 1.302              | null    | GAATGGTGTATATGTTGACAGTCAAGCGTCTCAGGTGCGGTAAGTCAGT   |



**Supplementary Table S3. List of primers used in this work.**

|        |                                                              |
|--------|--------------------------------------------------------------|
| CMB49  | CCGCTCGAGTAATACGACTCACTATAGGGAGAGAGGAA                       |
| CMB50  | CTTCAGCTTTGTTCCCCATCCCTCTTCCCTCTCCCTATAGTGAGTC               |
| CMB51  | GATGGGGAACAAAGCTGAAGTACTTACCCAAGATCATCCCGAACGA               |
| CMB56  | TCGACCTCTGGGTTATGTCGTTTCGGGATGATCTTGGG                       |
| CMB77  | GGGAGAGAGGAAGAGGGGATGGG                                      |
| CMB94  | TCGACCTCTGGGTTATGTCGTTTC                                     |
| CMB95  | CCGCTCGAGTAATACGACTCACTATAGGGAGACAAGAT                       |
| CMB96  | GCAGCGTTCCCTCGATGGCCTTGATCTTGTCTCCCTATAGTGAGTCG              |
| CMB97  | CATCGAGGAACGCTGCCTACACACATGGACATAAACAAGAGCCGA)               |
| CMB98  | CCATTTTCTCGCCCTCTTCGGCTCTTGTTTATGTCCATG                      |
| CMB104 | TTCTCGCCCTCTTCGGCTCTTGTTTA                                   |
| CMB106 | GAGACAAGATCAAGGCCATCGAGGAA                                   |
| CMB107 | CACTATAGGGAGCTCAGAATAAACGCTCAAACGAACGTACAAGTTATGAGAACTG      |
| CMB108 | CGAATGAGTGTGGATGACAATAGGGAGGTCAGTTCTCATAACTTGTACGTTTCGT      |
| CMB109 | GCCGGATCCGGGCCTCATGTTCGAATGAGTGTGGATGACAATAGG                |
| CMB112 | CACTATAGGGAGCTCAGAATAAACGCTCAACAACGGATCACACGCAAGCGAA         |
| CMB113 | GCGACCCTTAGACCCGAAGGACATAGATTCGCTTGC GTGTGATCCGTTGTTG        |
| CMB114 | GCCGGATCCGGGCCTCATGTTCGAAAGCGACCCTTAGACCCGAAGGACATAGA        |
| CMB116 | AGTCTCTCCTAGAGGGTGACGCGTCACCCCGACTGAGCTCAGTAACTTGA           |
| CMB117 | GCCGGATCCGGGCCTCATGTTCGAAACAGAGTCTCTCCTAGAGGGTGACGCGT        |
| CMB119 | CGAACC ACTACAATATGATATTAGATCTCCAGATCGGATATATTAATTTGATCTTG    |
| CMB120 | GCCGGATCCGGGCCTCATGTTCGAACCACTACAATATGATATTAGATCT            |
| CMB122 | CTCGCAAAAAGACTTGGGGAAGGAGCGAAAAAGTGACAGTCTCAGGC              |
| CMB123 | GCCGGATCCGGGCCTCATGTTCGAAACTCGCAAAAAGACTTGGGGAAGGA           |
| CMB125 | TCGCTATTTGGGCGGTAGAGCTTACCCCTCTCCCCGAACTCAGTAACTTTGAG        |
| CMB126 | CACTATAGGGAGCTCAGAATAAACGCTCAAGTTACTGAGCTCAGTCGGGGT          |
| CMB127 | GCCGGATCCGGGCCTCATGCTGAGCTCAGTAACTT GAGCGTTTATTCTGAGCTCCCTAT |
| CMB130 | CACTATAGGGAGCTCAGAATAAACGCTCAAACCGATGAGCTCAGTCGGGGT          |
| CMB131 | AGTCTCTCCTAGAGGGTGACGCGTCACCCCGACTGAGCTCATCGGTTTGA           |
| CMB132 | GCCGGATCCGGGCCTCATGTTCGAAACAGAGTCTCTCCTAGAGGGTGACGCGT        |

|                           |                                                                                                  |
|---------------------------|--------------------------------------------------------------------------------------------------|
| CMB133                    | ATAGGGAGCTCAGAATAAACGCTCAAGATCAAATTTAATATATCCGATCTGGAGATCTAA                                     |
| CMB134                    | CTATAGGGAGCTCAGAATAAACGCTCAACTGCCTGAGACTGCACTTTTTTCG                                             |
| CMB139                    | CTCTCCCCGGAACATCGGTTTTGAGCGTTTATTCTGAGCTCCCTATAGTG                                               |
| CMB140                    | TCGCTATTTGGGCGGTAGAGCTTACCCCTCTCCCCGGAACATCGGTTTTGAG                                             |
| CMB141                    | GCCGGATCCGGGCCTCATGTGCGAATCGCTATTTGGGCGGTAGAGCTC                                                 |
| CMB142                    | CACTATAGGGAGCTCAGAATAAACGCTCAAAGTTACTGAGTTCCGGGGAGAG                                             |
| CMB152                    | CTGGTCATGGCGGGCATTTAATTTCGGGCCTCATGTGCGAAACAGAG                                                  |
| CMB153                    | CTGGTCATGGCGGGCATTTAATTCTCGACCTCTGGGTATGTCGTT                                                    |
| CMB154                    | CTGGTCATGGCGGGCATTTAATTCCCATTTTCTCGCCCTCTTCG                                                     |
| CMB183                    | GCGGCTGTCTCCACAAGTCGCCGGATCCGGGCCT                                                               |
| SELEX Library<br>template | CCGAAGCTTAATACGACTCACTATAGGGAGCTCAGAATAAACGCTCAA-[N <sub>50</sub> ]-<br>TTCGACATGAGGCCCGGATCCGGC |
| SELEX Forward<br>Primer   | CCGAAGCTTAATACGACTCACTATAGGGAGCTCAGAATAAACGCTCAA                                                 |
| SELEX Reverse<br>Primer   | GCCGGATCCGGGCCTCATGTGCGAA                                                                        |
| Capture Oligo             | Biotin-CTGGTCATGGCGGGCATTTAATTC                                                                  |
